# Supplementary material for: SARS-CoV-2 multi-antigen protein microarray for detailed characterization of antibody responses in COVID-19 patients
Source: PubMed Central journal article supplement (PMC9910743; doi:10.1371/journal.pone.0276829), 2023-02-09
Supplement: pone.0276829.s001.pdf [file pone.0276829.s001.pdf]

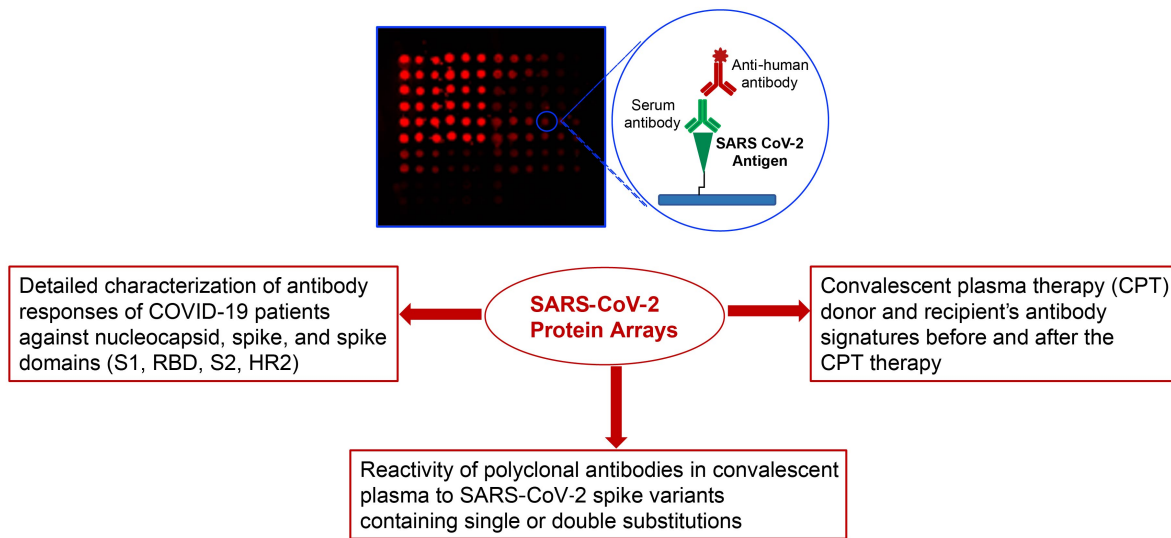

**S1 Fig. Study design for SARS-CoV-2 multi-antigen protein array.**
