# Supplementary material for: SARS-CoV-2 multi-antigen protein microarray for detailed characterization of antibody responses in COVID-19 patients
Source: PubMed Central journal article supplement (PMC9910743; doi:10.1371/journal.pone.0276829), 2023-02-09
Supplement: pone.0276829.s003.pdf [file pone.0276829.s003.pdf]

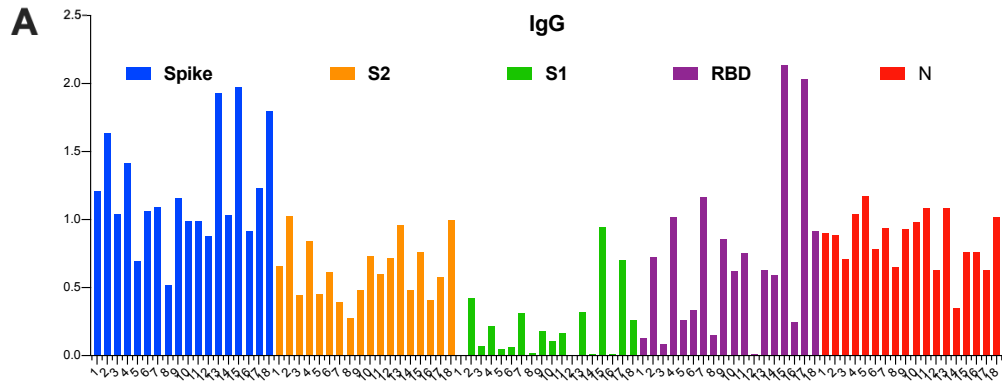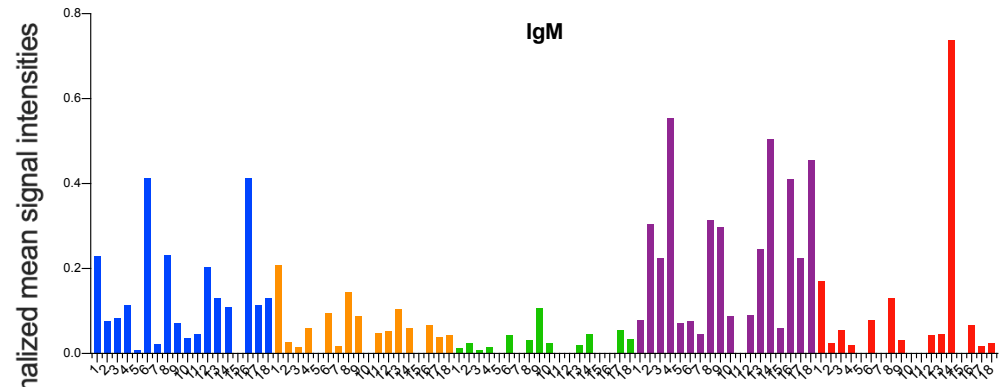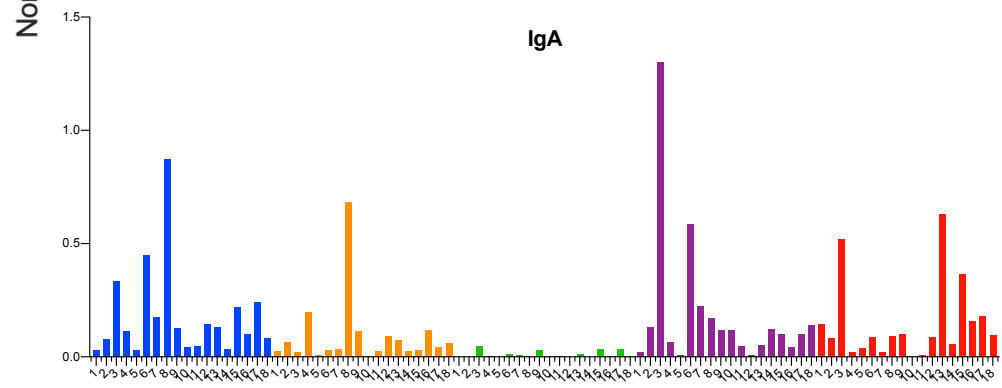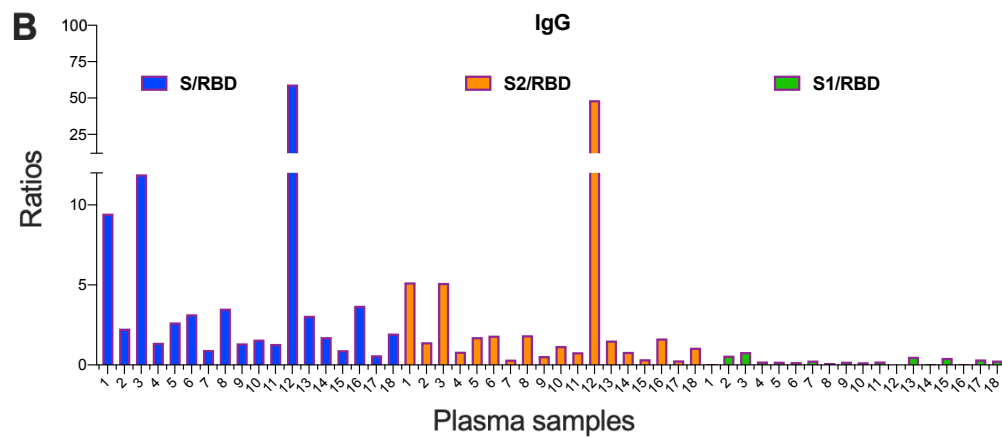

**S3 Fig. Immunoprofiling COVID-19 patients against multiple SARS-CoV-2**

**antigens.** (A) Bar plots are showing IgG, IgM, and IgA response to 4.8 fmol of each S, S2, S1, RBD and N antigen for 18 patients who were infected early in the pandemic. The signal intensities are normalized relative to corresponding concentration of Ig isotype controls and mean values are calculated for the replicates of target antigen for each plasma sample. (B) The ratios of S, S2 and S1 to RBD domain are shown as bar plots for IgG.
