# Supplementary material for: SARS-CoV-2 multi-antigen protein microarray for detailed characterization of antibody responses in COVID-19 patients
Source: PubMed Central journal article supplement (PMC9910743; doi:10.1371/journal.pone.0276829), 2023-02-09
Supplement: pone.0276829.s005.pdf [file pone.0276829.s005.pdf]

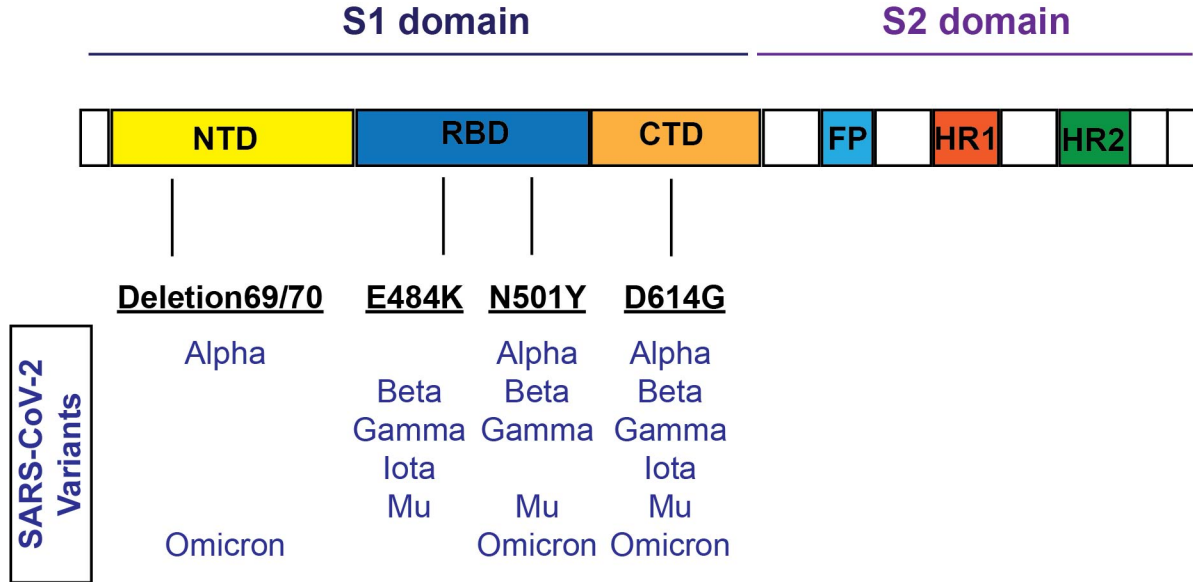

**S5 Fig. Shared Spike mutations in SARS-CoV-2 variants.** S variants' shared mutations E484K, N501Y, D614G and Deletion69/70 are shown with their location on S1 domain of S protein. NTD, N-terminal domain; RBD, Receptor binding domain; CTD, C-terminal domain; FP, Fusion peptide; HR1, Heptad repeat 1; HR2, Heptad repeat 2.
